# Supplementary material for: The Cell Membrane of a Novel Rhizobium phaseoli Strain Is the Crucial Target for Aluminium Toxicity and Tolerance
Source: MDPI journal article supplement (doi:10.3390/cells11050873), 2022-03-03
Supplement: s1 [file s1]

Figure S1: Predicted protein topology of (A) AMC88\_RS25470 (BON domain-containing protein), (B) AMC88\_RS00605 (putrescine-ornithine antiporter protein), and (C) AMC88\_RS16850 (DUF1236 domain-containing protein).

Table S1. Details of analysis of GABA and amino acids by LC-MS/MS [HPLC 1260 (Agilent Technologies)-QTRAP6500 (SCIEX)] in positive ionization mode

| <b>compound</b> | <b>Q1</b> | <b>Q3</b> | <b>RT<br/>(min)</b> | <b>Internal<br/>standard</b> | <b>IS Q1</b> | <b>IS Q3</b> | <b>DP</b> | <b>CE</b> |
|-----------------|-----------|-----------|---------------------|------------------------------|--------------|--------------|-----------|-----------|
| GABA            | 104.1     | 87.1      | 0.5                 | 13C,15N-Ala                  |              |              |           |           |
| Ala             | 90.1      | 44.1      | 0.5                 | 13C,15N-Ala                  | 94.1         | 47.1         | 20        | 17        |
| Pro             | 116.1     | 70.0      | 0.5                 | 13C,15N-Pro                  | 122.1        | 75.0         | 20        | 19        |
| Val             | 118.1     | 72.2      | 0.5                 | 13C,15N-Val                  | 124.1        | 77.2         | 20        | 13        |
| Thr             | 120.1     | 74.2      | 0.5                 | 13C,15N-Thr                  | 125.1        | 78.2         | 20        | 13        |
| Ile             | 132.2     | 86.1      | 1.1                 | 13C,15N-Ile                  | 139.2        | 92.1         | 20        | 13        |
| Leu             | 132.2     | 86.1      | 1.3                 | 13C,15N-Leu                  | 139.2        | 92.1         | 20        | 13        |
| Met             | 150.2     | 104.1     | 0.7                 | 13C,15N-Met                  | 156.2        | 109.1        | 20        | 13        |
| Phe             | 166.2     | 120.2     | 2.6                 | 13C,15N-Phe                  | 176.2        | 129.2        | 20        | 17        |
| Arg             | 175.1     | 70.1      | 0.4                 | 13C,15N-Arg                  | 185.1        | 75.1         | 20        | 31        |
| Tyr             | 182.1     | 136.2     | 1.4                 | 13C,15N-Tyr                  | 192.1        | 145.2        | 20        | 17        |
| Lys             | 147.1     | 84.1      | 0.4                 | 13C,15N-Lys                  | 155.1        | 90.1         | 20        | 23        |
