# Supplementary figures and images for: The Cell Membrane of a Novel Rhizobium phaseoli Strain Is the Crucial Target for Aluminium Toxicity and Tolerance
Source: MDPI journal article supplement (doi:10.3390/cells11050873), 2022-03-03

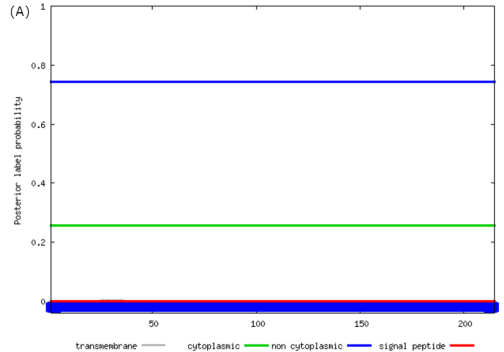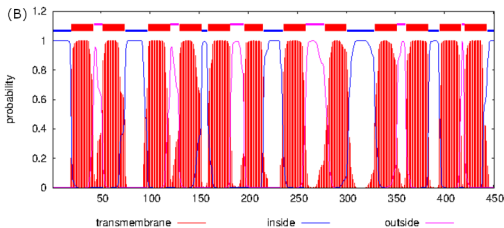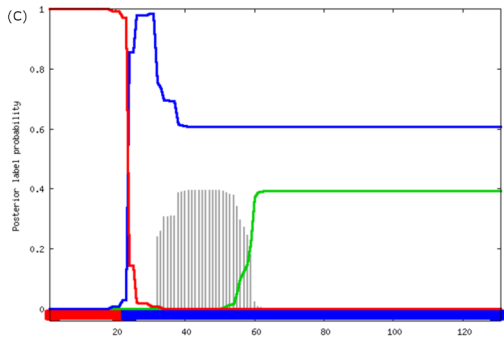

Supplement: s1 [file s1]
